# Supplementary material
Source: PubMed Central journal article supplement (PMC9005107)
Supplement: NIHMS1540891-supplement-SDC.pdf [file NIHMS1540891-supplement-SDC.pdf]

## Supplemental Tables

**Supplemental Table 1. Descriptive Statistics of Subjects Excluded for Incomplete Coordinate Data**

| Characteristic <sup>a</sup> | Category                       | Cases        | Controls     | <i>p</i> |
|-----------------------------|--------------------------------|--------------|--------------|----------|
| n                           |                                | 85           | 502          |          |
| Birth year                  | 1997-1999                      | 31 (36.5%)   | 181 (36.1%)  | 0.74     |
|                             | 2000-2002                      | 19 (22.4%)   | 129 (25.7%)  |          |
|                             | 2003-2005                      | 16 (18.8%)   | 103 (20.5%)  |          |
|                             | 2006-2007                      | 19 (22.4%)   | 89 (17.7%)   |          |
| Age at diagnosis (years)    | 0-1                            | 27 (31.8%)   | NA           | 0.86     |
|                             | 2-6                            | 49 (57.6%)   | NA           |          |
|                             | >6                             | 9 (10.6%)    | NA           |          |
| Sex                         | Male                           | 49 (57.6%)   | 298 (59.4%)  | 0.27     |
|                             | Female                         | 36 (42.4%)   | 204 (40.6%)  |          |
| Age of mother (years)       | Mean (SD)                      | 27.74 (6.91) | 26.84 (6.37) | 0.56     |
| Age of father (years)       | Mean (SD)                      | 30.31 (7.49) | 29.78 (7.24) | 0.88     |
| Race/ethnicity of mother    | White, non-Hispanic            | 31 (36.5%)   | 157 (31.3%)  | 0.49     |
|                             | Hispanic                       | 35 (41.2%)   | 247 (49.2%)  |          |
|                             | Black, NH                      | 5 (5.9%)     | 24 (4.8%)    |          |
|                             | Asian & Pacific Islander, NH   | 5 (5.9%)     | 33 (6.6%)    |          |
|                             | Alaskan & Native American, NH1 | 1 (1.2%)     | 5 (1.0%)     |          |
|                             | Other                          | 8 (9.4%)     | 36 (7.2%)    |          |
| Race/ethnicity of father    | White, non-Hispanic            | 29 (34.1%)   | 130 (25.9%)  | 0.74     |
|                             | Hispanic                       | 29 (34.1%)   | 216 (43.0%)  |          |
|                             | Black, NH                      | 6 (7.1%)     | 24 (4.8%)    |          |
|                             | Asian & Pacific Islander, NH   | 3 (3.5%)     | 30 (6.0%)    |          |
|                             | Alaskan & Native American, NH2 | 2 (2.4%)     | 6 (1.2%)     |          |
|                             | Other                          | 16 (18.8%)   | 96 (19.1%)   |          |

<sup>a</sup> Since these subjects could not be geocoded, we could not assign them to a block group; therefore, we do not have neighborhood census data for them (ie. median income, education or population density).

Abbreviations: SD (standard deviation), NH (non-Hispanic), NA (not applicable)

**Supplemental Table 2. Demographic Characteristics of the Lymphoid Leukemias Dataset (ICCCMDG Code: 11)**

| <b>Characteristic</b>    | <b>Category</b>               | <b>Cases</b>        | <b>Controls</b>     | <b><i>p</i></b> |
|--------------------------|-------------------------------|---------------------|---------------------|-----------------|
| n                        |                               | 2014                | 7980                | NA              |
| Birth year               | 1997-1999                     | 708 (35.2%)         | 2797 (35.1%)        | 1.000           |
|                          | 2000-2002                     | 601 (29.8%)         | 2386 (29.9%)        | NA              |
|                          | 2003-2005                     | 516 (25.6%)         | 2049 (25.7%)        | NA              |
|                          | 2006-2007                     | 189 (9.4%)          | 748 (9.4%)          | NA              |
| Age at diagnosis (years) | 0-1                           | 324 (16.1%)         | NA                  | NA              |
|                          | 2-6                           | 1444 (71.7%)        | NA                  | NA              |
|                          | >6                            | 246 (12.2%)         | NA                  | NA              |
| Sex                      | Male                          | 1118 (55.5%)        | 4437 (55.6%)        | 0.962           |
|                          | Female                        | 896 (44.5%)         | 3543 (44.4%)        | NA              |
| Age of mother (years)    | Mean (SD)                     | 28.36 (6.46)        | 27.89 (6.35)        | 0.003           |
| Age of father (years)    | Mean (SD)                     | 31.02 (7.06)        | 30.73 (7.12)        | 0.118           |
| Median household income  | Mean (SD)                     | 48707.66 (23697.02) | 47788.51 (23718.03) | 0.120           |
| Adults without a GED     | Mean (SD)                     | 0.30 (0.22)         | 0.31 (0.22)         | 0.254           |
| Population density       | Mean (SD)                     | 0.00386 (0.00378)   | 0.00415 (0.00445)   | 0.003           |
| Race/ethnicity of mother | White, non-Hispanic           | 623 (30.9%)         | 2469 (30.9%)        | 0.949           |
|                          | Hispanic                      | 1050 (52.1%)        | 4125 (51.7%)        | NA              |
|                          | Black, NH                     | 67 (3.3%)           | 272 (3.4%)          | NA              |
|                          | Asian & Pacific Islander, NH  | 205 (10.2%)         | 844 (10.6%)         | NA              |
|                          | Alaskan & Native American, NH | 11 (0.5%)           | 32 (0.4%)           | NA              |
|                          | Other                         | 58 (2.9%)           | 238 (3.0%)          | NA              |
| Race/ethnicity of father | White, non-Hispanic           | 641 (31.8%)         | 2369 (29.7%)        | 0.353           |
|                          | Hispanic                      | 968 (48.1%)         | 3832 (48.0%)        | NA              |
|                          | Black, NH                     | 75 (3.7%)           | 351 (4.4%)          | NA              |
|                          | Asian & Pacific Islander, NH  | 167 (8.3%)          | 721 (9.0%)          | NA              |
|                          | Alaskan & Native American, NH | 7 (0.3%)            | 31 (0.4%)           | NA              |
|                          | Other                         | 156 (7.7%)          | 676 (8.5%)          | NA              |

Abbreviations: SD (standard deviation), NH (non-Hispanic), NA (not applicable), GED (general education diploma)

**Supplemental Table 3. Demographic Characteristics of the Lymphoid Leukemias Dataset, Ages 0 to 1 (ICCCMDG Code: 11)**

| Characteristic           | Category                      | Cases                  | Controls              | <i>p</i> |
|--------------------------|-------------------------------|------------------------|-----------------------|----------|
| n                        |                               | 324                    | 1285                  | NA       |
| Birth year               | 1997-1999                     | 99 (30.6%)             | 389 (30.3%)           | 0.999    |
|                          | 2000-2002                     | 78 (24.1%)             | 313 (24.4%)           | NA       |
|                          | 2003-2005                     | 91 (28.1%)             | 359 (27.9%)           | NA       |
|                          | 2006-2007                     | 56 (17.3%)             | 224 (17.4%)           | NA       |
| Age at diagnosis         | 0-1                           | 324 (100%)             | NA                    | NA       |
|                          | 2-6                           | NA                     | NA                    | NA       |
|                          | >6                            | NA                     | NA                    | NA       |
| Sex                      | Male                          | 175 (54.0%)            | 691 (53.8%)           | 0.988    |
|                          | Female                        | 149 (46.0%)            | 594 (46.2%)           | NA       |
| Age of mother            | Mean (SD)                     | 28.6 (6.31)            | 28.18 (6.31)          | 0.282    |
| Age of father            | Mean (SD)                     | 31.66 (7.14)           | 31 (6.93)             | 0.145    |
| Median household income  | Mean (SD)                     | 47366.49<br>(22957.93) | 48305.99<br>(23797.2) | 0.514    |
| Adults without a GED     | Mean (SD)                     | 0.31 (0.23)            | 0.30 (0.22)           | 0.725    |
| Population density       | Mean (SD)                     | 0.00375 (0.00368)      | 0.00403 (0.00440)     | 0.240    |
| Race/ethnicity of mother | White, non-Hispanic           | 98 (30.2%)             | 388 (30.2%)           | 0.981    |
|                          | Hispanic                      | 163 (50.3%)            | 644 (50.1%)           | NA       |
|                          | Black, NH                     | 10 (3.1%)              | 42 (3.3%)             | NA       |
|                          | Asian & Pacific Islander, NH  | 34 (10.5%)             | 136 (10.6%)           | NA       |
|                          | Alaskan & Native American, NH | 2 (0.6%)               | 4 (0.3%)              | NA       |
|                          | Other                         | 17 (5.2%)              | 71 (5.5%)             | NA       |
|                          |                               |                        |                       |          |
| Race/ethnicity of father | White, non-Hispanic           | 104 (32.1%)            | 377 (29.3%)           | 0.633    |
|                          | Hispanic                      | 154 (47.5%)            | 600 (46.7%)           | NA       |
|                          | Black, NH                     | 10 (3.1%)              | 51 (4.0%)             | NA       |
|                          | Asian & Pacific Islander, NH  | 26 (8.0%)              | 118 (9.2%)            | NA       |
|                          | Alaskan & Native American, NH | 0 (0.0%)               | 9 (0.7%)              | NA       |
|                          | Other                         | 30 (9.3%)              | 130 (10.1%)           | NA       |
|                          |                               |                        |                       |          |

Abbreviations: SD (standard deviation), NH (non-Hispanic), NA (not applicable), GED (general education diploma)

**Supplemental Table 4. Demographic Characteristics of the Lymphoid Leukemias Dataset, Ages 2 to 6 (ICCCMDG Code: 11)**

| Characteristic           | Category                      | Cases               | Controls            | <i>p</i> |
|--------------------------|-------------------------------|---------------------|---------------------|----------|
| n                        |                               | 1444                | 5720                | NA       |
| Birth year               | 1997-1999                     | 453 (31.4%)         | 1793 (31.3%)        | 1.000    |
|                          | 2000-2002                     | 442 (30.6%)         | 1748 (30.6%)        | NA       |
|                          | 2003-2005                     | 416 (28.8%)         | 1655 (28.9%)        | NA       |
|                          | 2006-2007                     | 133 (9.2%)          | 524 (9.2%)          | NA       |
| Age at diagnosis         | 0-1                           | NA                  | NA                  | NA       |
|                          | 2-6                           | 1444 (100.0%)       | NA                  | NA       |
|                          | >6                            | NA                  | NA                  | NA       |
| Sex                      | Male                          | 804 (55.7%)         | 3189 (55.8%)        | 0.984    |
|                          | Female                        | 640 (44.3%)         | 2531 (44.2%)        | NA       |
| Age of mother            | Mean (SD)                     | 28.46 (0.51)        | 27.90 (6.35)        | 0.003    |
| Age of father            | Mean (SD)                     | 31.04 (7.11)        | 30.73 (7.17)        | 0.149    |
| Median household income  | Mean (SD)                     | 49784.83 (24071.64) | 48108.61 (23901.34) | 0.018    |
| Adults without a GED     | Mean (SD)                     | 0.29 (0.21)         | 0.30 (0.22)         | 0.074    |
| Population density       | Mean (SD)                     | 0.00384 (0.00379)   | 0.00411 (0.00443)   | 0.021    |
| Race/ethnicity of mother | White, non-Hispanic           | 466 (32.3%)         | 1847 (32.3%)        | 0.997    |
|                          | Hispanic                      | 741 (51.3%)         | 2904 (50.8%)        | NA       |
|                          | Black, NH                     | 44 (3%)             | 176 (3.1%)          | NA       |
|                          | Asian & Pacific Islander, NH  | 148 (10.2%)         | 618 (10.8%)         | NA       |
|                          | Alaskan & Native American, NH | 5 (0.3%)            | 23 (0.4%)           | NA       |
|                          | Other                         | 40 (2.8%)           | 152 (2.7%)          | NA       |
| Race/ethnicity of father | White, non-Hispanic           | 480 (33.2%)         | 1763 (30.8%)        | 0.594    |
|                          | Hispanic                      | 674 (46.7%)         | 2706 (47.3%)        | NA       |
|                          | Black, NH                     | 55 (3.8%)           | 236 (4.1%)          | NA       |
|                          | Asian & Pacific Islander, NH  | 120 (8.3%)          | 518 (9.1%)          | NA       |
|                          | Alaskan & Native American, NH | 6 (0.4%)            | 18 (0.3%)           | NA       |
|                          | Other                         | 109 (7.5%)          | 479 (8.4%)          | NA       |

Abbreviations: SD (standard deviation), NH (non-Hispanic), NA (not applicable), GED (general education diploma)

**Supplemental Table 5. Demographic Characteristics of the Lymphoid Leukemias Dataset, Hispanic (ICCCMDG Code: 11)**

| Characteristic           | Category                      | Cases             | Controls            | <i>p</i> |
|--------------------------|-------------------------------|-------------------|---------------------|----------|
| n                        |                               | 1050              | 4125                | NA       |
| Birth year               | 1997-1999                     | 378 (36.0%)       | 1458 (35.3%)        | 0.974    |
|                          | 2000-2002                     | 299 (28.5%)       | 1192 (28.9%)        | NA       |
|                          | 2003-2005                     | 278 (26.5%)       | 1108 (26.9%)        | NA       |
|                          | 2006-2007                     | 95 (9.0%)         | 367 (8.9%)          | NA       |
| Age at diagnosis         | 0-1                           | 163 (15.5%)       | NA                  | NA       |
|                          | 2-6                           | 741 (70.6%)       | NA                  | NA       |
|                          | >6                            | 146 (13.9%)       | NA                  | NA       |
| Sex                      | Male                          | 569 (54.2%)       | 2274 (55.1%)        | 0.610    |
|                          | Female                        | 481 (45.8%)       | 1851 (44.9%)        | NA       |
| Age of mother            | Mean (SD)                     | 26.8 (6.34)       | 26.37 (6.12)        | 0.047    |
| Age of father            | Mean (SD)                     | 29.35 (6.69)      | 29.11 (6.8)         | 0.327    |
| Median household income  | Mean (SD)                     | 40268.9 (16679.6) | 39234.52 (16800.83) | 0.073    |
| Adults without a GED     | Mean (SD)                     | 0.41 (0.22)       | 0.42 (0.21)         | 0.035    |
| Population density       | Mean (SD)                     | 0.00470 (0.00438) | 0.00508 (0.00487)   | 0.014    |
| Race/ethnicity of mother | White, non-Hispanic           | NA                | NA                  | NA       |
|                          | Hispanic                      | 1050 (100%)       | 4125 (100%)         | NA       |
|                          | Black, NH                     | NA                | NA                  | NA       |
|                          | Asian & Pacific Islander, NH  | NA                | NA                  | NA       |
|                          | Alaskan & Native American, NH | NA                | NA                  | NA       |
|                          | Other                         | NA                | NA                  | NA       |
| Race/ethnicity of father | White, non-Hispanic           | 90 (8.6%)         | 316 (7.7%)          | 0.802    |
|                          | Hispanic                      | 869 (82.8%)       | 3421 (82.9%)        | NA       |
|                          | Black, NH                     | 15 (1.4%)         | 66 (1.6%)           | NA       |
|                          | Asian & Pacific Islander, NH  | 6 (0.6%)          | 33 (0.8%)           | NA       |
|                          | Alaskan & Native American, NH | 2 (0.2%)          | 11 (0.3%)           | NA       |
|                          | Other                         | 68 (6.5%)         | 278 (6.7%)          | NA       |

Abbreviations: SD (standard deviation), NH (non-Hispanic), NA (not applicable), GED (general education diploma)

**Supplemental Table 6. Demographic Characteristics of the Acute Myeloid Leukemias Dataset (ICCCMDG Code: 12)**

| <b>Characteristic</b>    | <b>Category</b>               | <b>Cases</b>        | <b>Controls</b>     | <b><i>p</i></b> |
|--------------------------|-------------------------------|---------------------|---------------------|-----------------|
| n                        |                               | 321                 | 1290                | NA              |
| Birth year               | 1997-1999                     | 91 (28.3%)          | 372 (28.8%)         | 0.973           |
|                          | 2000-2002                     | 98 (30.5%)          | 387 (30%)           | NA              |
|                          | 2003-2005                     | 80 (24.9%)          | 311 (24.1%)         | NA              |
|                          | 2006-2007                     | 52 (16.2%)          | 220 (17.1%)         | NA              |
| Age at diagnosis         | 0-1                           | 179 (55.8%)         | NA                  | NA              |
|                          | 2-6                           | 103 (32.1%)         | NA                  | NA              |
|                          | >6                            | 39 (12.1%)          | NA                  | NA              |
| Sex                      | Male                          | 172 (53.6%)         | 680 (52.7%)         | 0.828           |
|                          | Female                        | 149 (46.4%)         | 610 (47.3%)         | NA              |
| Age of mother            | Mean (SD)                     | 28.65 (6.87)        | 27.91 (6.15)        | 0.077           |
| Age of father            | Mean (SD)                     | 31.09 (7.25)        | 30.75 (7.12)        | 0.463           |
| Median household income  | Mean (SD)                     | 46719.69 (22578.25) | 48227.48 (24300.86) | 0.292           |
| Adults without a GED     | Mean (SD)                     | 0.30 (0.21)         | 0.30 (0.22)         | 0.945           |
| Population density       | Mean (SD)                     | 0.004 (0.00365)     | 0.00398 (0.00411)   | 0.955           |
| Race/ethnicity of mother | White, non-Hispanic           | 101 (31.5%)         | 391 (30.3%)         | 0.927           |
|                          | Hispanic                      | 155 (48.3%)         | 633 (49.1%)         | NA              |
|                          | Black, NH                     | 12 (3.7%)           | 52 (4.0%)           | NA              |
|                          | Asian & Pacific Islander, NH  | 36 (11.2%)          | 141 (10.9%)         | NA              |
|                          | Alaskan & Native American, NH | 2 (0.6%)            | 5 (0.4%)            | NA              |
|                          | Other                         | 15 (4.7%)           | 68 (5.3%)           | NA              |
| Race/ethnicity of father | White, non-Hispanic           | 88 (27.4%)          | 376 (29.1%)         | 0.336           |
|                          | Hispanic                      | 146 (45.5%)         | 584 (45.3%)         | NA              |
|                          | Black, NH                     | 19 (5.9%)           | 53 (4.1%)           | NA              |
|                          | Asian & Pacific Islander, NH  | 37 (11.5%)          | 131 (10.2%)         | NA              |
|                          | Alaskan & Native American, NH | 0 (0%)              | 3 (0.2%)            | NA              |
|                          | Other                         | 31 (9.7%)           | 143 (11.1%)         | NA              |

Abbreviations: SD (standard deviation), NH (non-Hispanic), NA (not applicable), GED (general education diploma)

**Supplemental Table 7. Demographic Characteristics of the Hodgkin Lymphomas Dataset (ICCCMDG Code: 21)**

| <b>Characteristic</b>    | <b>Category</b>               | <b>Cases</b>        | <b>Controls</b>    | <b><i>p</i></b> |
|--------------------------|-------------------------------|---------------------|--------------------|-----------------|
| n                        |                               | 85                  | 332                | NA              |
| Birth year               | 1997-1999                     | 57 (67.1%)          | 221 (66.6%)        | 1.000           |
|                          | 2000-2002                     | 17 (20.0%)          | 67 (20.2%)         | NA              |
|                          | 2003-2005                     | 10 (11.8%)          | 40 (12.0%)         | NA              |
|                          | 2006-2007                     | 1 (1.2%)            | 4 (1.2%)           | NA              |
| Age at diagnosis         | 0-1                           | 0 (0.0%)            | NA                 | NA              |
|                          | 2-6                           | 32 (37.6%)          | NA                 | NA              |
|                          | >6                            | 53 (62.4%)          | NA                 | NA              |
| Sex                      | Male                          | 62 (72.9%)          | 241 (72.6%)        | 1.000           |
|                          | Female                        | 23 (27.1%)          | 91 (27.4%)         | NA              |
| Age of mother            | Mean (SD)                     | 26.49 (5.87)        | 27.38 (6.04)       | 0.220           |
| Age of father            | Mean (SD)                     | 30.09 (6.89)        | 30.83 (7.28)       | 0.402           |
| Median household income  | Mean (SD)                     | 43851.84 (19548.71) | 46527.6 (23942.42) | 0.285           |
| Adults without a GED     | Mean (SD)                     | 0.33 (0.20)         | 0.32 (0.22)        | 0.798           |
| Population density       | Mean (SD)                     | 0.00374 (0.00391)   | 0.0043 (0.00419)   | 0.250           |
| Race/ethnicity of mother | White, non-Hispanic           | 23 (27.1%)          | 95 (28.6%)         | 0.919           |
|                          | Hispanic                      | 45 (52.9%)          | 166 (50.0%)        | NA              |
|                          | Black, NH                     | 9 (10.6%)           | 36 (10.8%)         | NA              |
|                          | Asian & Pacific Islander, NH  | 7 (8.2%)            | 33 (9.9%)          | NA              |
|                          | Alaskan & Native American, NH | 0 (0.0%)            | 1 (0.3%)           | NA              |
|                          | Other                         | 1 (1.2%)            | 1 (0.3%)           | NA              |
| Race/ethnicity of father | White, non-Hispanic           | 22 (25.9%)          | 92 (27.7%)         | 0.864           |
|                          | Hispanic                      | 41 (48.2%)          | 151 (45.5%)        | NA              |
|                          | Black, NH                     | 11 (12.9%)          | 31 (9.3%)          | NA              |
|                          | Asian & Pacific Islander, NH  | 5 (5.9%)            | 31 (9.3%)          | NA              |
|                          | Alaskan & Native American, NH | 0 (0.0%)            | 2 (0.6%)           | NA              |
|                          | Other                         | 6 (7.1%)            | 25 (7.5%)          | NA              |

Abbreviations: SD (standard deviation), NH (non-Hispanic), NA (not applicable), GED (general education diploma)

**Supplemental Table 8. Demographic Characteristics of the Non-Hodgkin Lymphomas Dataset (ICCCMDG Code: 22)**

| Characteristic           | Category                      | Cases               | Controls            | <i>p</i> |
|--------------------------|-------------------------------|---------------------|---------------------|----------|
| n                        |                               | 166                 | 651                 | NA       |
| Birth year               | 1997-1999                     | 74 (44.6%)          | 290 (44.5%)         | 1.000    |
|                          | 2000-2002                     | 52 (31.3%)          | 205 (31.5%)         | NA       |
|                          | 2003-2005                     | 27 (16.3%)          | 106 (16.3%)         | NA       |
|                          | 2006-2007                     | 13 (7.8%)           | 50 (7.7%)           | NA       |
| Age at diagnosis         | 0-1                           | 16 (9.6%)           | NA                  | NA       |
|                          | 2-6                           | 86 (51.8%)          | NA                  | NA       |
|                          | >6                            | 64 (38.6%)          | NA                  | NA       |
| Sex                      | Male                          | 103 (62.0%)         | 408 (62.7%)         | 0.953    |
|                          | Female                        | 63 (38.0%)          | 243 (37.3%)         | NA       |
| Age of mother            | Mean (SD)                     | 27.72 (6.46)        | 27.99 (0.14)        | 0.632    |
| Age of father            | Mean (SD)                     | 30.64 (7.08)        | 30.94 (0.86)        | 0.651    |
| Median household income  | Mean (SD)                     | 49354.89 (24363.07) | 48940.87 (24243.47) | 0.845    |
| Adults without a GED     | Mean (SD)                     | 0.29 (0.22)         | 0.29 (0.22)         | 0.869    |
| Population density       | Mean (SD)                     | 0.0041 (0.00355)    | 0.00392 (0.0036)    | 0.565    |
| Race/ethnicity of mother | White, non-Hispanic           | 58 (34.9%)          | 215 (33.0%)         | 0.799    |
|                          | Hispanic                      | 66 (39.8%)          | 276 (42.4%)         | NA       |
|                          | Black, NH                     | 10 (6.0%)           | 37 (5.7%)           | NA       |
|                          | Asian & Pacific Islander, NH  | 25 (15.1%)          | 95 (14.6%)          | NA       |
|                          | Alaskan & Native American, NH | 0 (0.0%)            | 8 (1.2%)            | NA       |
|                          | Other                         | 7 (4.2%)            | 20 (3.1%)           | NA       |
| Race/ethnicity of father | White, non-Hispanic           | 46 (27.7%)          | 206 (31.6%)         | 0.339    |
|                          | Hispanic                      | 71 (42.8%)          | 265 (40.7%)         | NA       |
|                          | Black, NH                     | 9 (5.4%)            | 44 (6.8%)           | NA       |
|                          | Asian & Pacific Islander, NH  | 19 (11.4%)          | 84 (12.9%)          | NA       |
|                          | Alaskan & Native American, NH | 0 (0.0%)            | 4 (0.6%)            | NA       |
|                          | Other                         | 21 (12.7%)          | 48 (7.4%)           | NA       |

Abbreviations: SD (standard deviation), NH (non-Hispanic), NA (not applicable), GED (general education diploma)



**Supplemental Table 9. Demographic Characteristics of the Burkitt Lymphoma Dataset (ICCCMDG Code: 23)**

| <b>Characteristic</b>    | <b>Category</b>               | <b>Cases</b>        | <b>Controls</b>     | <b><i>p</i></b> |
|--------------------------|-------------------------------|---------------------|---------------------|-----------------|
| n                        |                               | 76                  | 307                 | NA              |
| Birth year               | 1997-1999                     | 40 (52.6%)          | 161 (52.4%)         | 1.000           |
|                          | 2000-2002                     | 19 (25%)            | 78 (25.4%)          | NA              |
|                          | 2003-2005                     | 13 (17.1%)          | 52 (16.9%)          | NA              |
|                          | 2006-2007                     | 4 (5.3%)            | 16 (5.2%)           | NA              |
| Age at diagnosis         | 0-1                           | 1 (1.3%)            | NA                  | NA              |
|                          | 2-6                           | 52 (68.4%)          | NA                  | NA              |
|                          | >6                            | 23 (30.3%)          | NA                  | NA              |
| Sex                      | Male                          | 68 (89.5%)          | 275 (89.6%)         | 1.000           |
|                          | Female                        | 8 (10.5%)           | 32 (10.4%)          | NA              |
| Age of mother            | Mean (SD)                     | 28.63 (6.1)         | 28.98 (6.32)        | 0.661           |
| Age of father            | Mean (SD)                     | 31.55 (7.5)         | 31.65 (7.46)        | 0.915           |
| Median household income  | Mean (SD)                     | 53143.38 (24812.21) | 49181.62 (23645.36) | 0.211           |
| Adults without a GED     | Mean (SD)                     | 0.26 (0.21)         | 0.26 (0.21)         | 0.952           |
| Population density       | Mean (SD)                     | 0.00295 (0.00268)   | 0.00343 (0.00302)   | 0.176           |
| Race/ethnicity of mother | White, non-Hispanic           | 43 (56.6%)          | 164 (53.4%)         | 0.978           |
|                          | Hispanic                      | 21 (27.6%)          | 95 (30.9%)          | NA              |
|                          | Black, NH                     | 3 (3.9%)            | 12 (3.9%)           | NA              |
|                          | Asian & Pacific Islander, NH  | 9 (11.8%)           | 36 (11.7%)          | NA              |
|                          | Alaskan & Native American, NH | 0 (0.0%)            | 0 (0.0%)            | NA              |
|                          | Other                         | 0 (0.0%)            | 0 (0.0%)            | NA              |
| Race/ethnicity of father | White, non-Hispanic           | 42 (55.3%)          | 146 (47.6%)         | 0.615           |
|                          | Hispanic                      | 20 (26.3%)          | 91 (29.6%)          | NA              |
|                          | Black, NH                     | 3 (3.9%)            | 10 (3.3%)           | NA              |
|                          | Asian & Pacific Islander, NH  | 9 (11.8%)           | 40 (13.0%)          | NA              |
|                          | Alaskan & Native American, NH | 0 (0.0%)            | 3 (1.0%)            | NA              |
|                          | Other                         | 2 (2.6%)            | 17 (5.5%)           | NA              |

Abbreviations: SD (standard deviation), NH (non-Hispanic), NA (not applicable), GED (general education diploma)

**Supplemental Table 10. Demographic Characteristics of the Miscellaneous Lymphoreticular Neoplasms Dataset (ICCCMDG Code: 24)**

| Characteristic           | Category                      | Cases               | Controls            | <i>p</i> |
|--------------------------|-------------------------------|---------------------|---------------------|----------|
| n                        |                               | 73                  | 293                 | NA       |
| Birth year               | 1997-1999                     | 20 (27.4%)          | 75 (25.6%)          | 0.976    |
|                          | 2000-2002                     | 21 (28.8%)          | 81 (27.6%)          | NA       |
|                          | 2003-2005                     | 20 (27.4%)          | 85 (29%)            | NA       |
|                          | 2006-2007                     | 12 (16.4%)          | 52 (17.7%)          | NA       |
| Age at diagnosis         | 0-1                           | 58 (79.5%)          | NA                  | NA       |
|                          | 2-6                           | 14 (19.2%)          | NA                  | NA       |
|                          | >6                            | 1 (1.4%)            | NA                  | NA       |
| Sex                      | Male                          | 33 (45.2%)          | 133 (45.4%)         | 1.000    |
|                          | Female                        | 40 (54.8%)          | 160 (54.6%)         | NA       |
| Age of mother            | Mean (SD)                     | 27.92 (5.66)        | 28 (6.18)           | 0.917    |
| Age of father            | Mean (SD)                     | 30.61 (6.94)        | 30.95 (7.44)        | 0.726    |
| Median household income  | Mean (SD)                     | 43690.59 (20178.69) | 48365.95 (24173.33) | 0.092    |
| Adults without a GED     | Mean (SD)                     | 0.33 (0.23)         | 0.31 (0.22)         | 0.627    |
| Population density       | Mean (SD)                     | 0.0043 (0.00412)    | 0.00418 (0.00424)   | 0.818    |
| Race/ethnicity of mother | White, non-Hispanic           | 16 (21.9%)          | 62 (21.2%)          | 0.929    |
|                          | Hispanic                      | 41 (56.2%)          | 169 (57.7%)         | NA       |
|                          | Black, NH                     | 0 (0.0%)            | 0 (0.0%)            | NA       |
|                          | Asian & Pacific Islander, NH  | 12 (16.4%)          | 41 (14.0%)          | NA       |
|                          | Alaskan & Native American, NH | 1 (1.4%)            | 2 (0.7%)            | NA       |
|                          | Other                         | 3 (4.1%)            | 19 (6.5%)           | NA       |
| Race/ethnicity of father | White, non-Hispanic           | 15 (20.5%)          | 58 (19.8%)          | 0.210    |
|                          | Hispanic                      | 42 (57.5%)          | 147 (50.2%)         | NA       |
|                          | Black, NH                     | 3 (4.1%)            | 3 (1.0%)            | NA       |
|                          | Asian & Pacific Islander, NH  | 8 (11.0%)           | 36 (12.3%)          | NA       |
|                          | Alaskan & Native American, NH | 0 (0.0%)            | 4 (1.4%)            | NA       |
|                          | Other                         | 5 (6.8%)            | 45 (15.4%)          | NA       |

Abbreviations: SD (standard deviation), NH (non-Hispanic), NA (not applicable), GED (general education diploma)

**Supplemental Table 11. Demographic Characteristics of the Ependymomas and Choroid Plexus Tumor Dataset (ICCCMDG Code: 31)**

| Characteristic           | Category                      | Cases                  | Controls               | <i>p</i> |
|--------------------------|-------------------------------|------------------------|------------------------|----------|
| n                        |                               | 146                    | 575                    | NA       |
| Birth year               | 1997-1999                     | 43 (29.5%)             | 174 (30.3%)            | 0.998    |
|                          | 2000-2002                     | 41 (28.1%)             | 159 (27.7%)            | NA       |
|                          | 2003-2005                     | 39 (26.7%)             | 152 (26.4%)            | NA       |
|                          | 2006-2007                     | 23 (15.8%)             | 90 (15.7%)             | NA       |
| Age at diagnosis         | 0-1                           | 57 (39%)               | NA                     | NA       |
|                          | 2-6                           | 76 (52.1%)             | NA                     | NA       |
|                          | >6                            | 13 (8.9%)              | NA                     | NA       |
| Sex                      | Male                          | 85 (58.2%)             | 337 (58.6%)            | 1.000    |
|                          | Female                        | 61 (41.8%)             | 238 (41.4%)            | NA       |
| Age of mother            | Mean (SD)                     | 28.93 (7.11)           | 27.83 (6.15)           | 0.088    |
| Age of father            | Mean (SD)                     | 31.97 (0.42)           | 30.78 (6.75)           | 0.128    |
| Median household income  | Mean (SD)                     | 50085.05<br>(29054.46) | 47331.72<br>(23601.58) | 0.291    |
| Adults without a GED     | Mean (SD)                     | 0.27 (0.21)            | 0.32 (0.23)            | 0.017    |
| Population density       | Mean (SD)                     | 0.0039 (0.00389)       | 0.00418 (0.00483)      | 0.465    |
| Race/ethnicity of mother | White, non-Hispanic           | 49 (33.6%)             | 169 (29.4%)            | 0.836    |
|                          | Hispanic                      | 70 (47.9%)             | 290 (50.4%)            | NA       |
|                          | Black, NH                     | 11 (7.5%)              | 45 (7.8%)              | NA       |
|                          | Asian & Pacific Islander, NH  | 8 (5.5%)               | 37 (6.4%)              | NA       |
|                          | Alaskan & Native American, NH | 1 (0.7%)               | 5 (0.9%)               | NA       |
|                          | Other                         | 7 (4.8%)               | 29 (5.0%)              | NA       |
| Race/ethnicity of father | White, non-Hispanic           | 42 (28.8%)             | 144 (25.0%)            | 0.829    |
|                          | Hispanic                      | 68 (46.6%)             | 275 (47.8%)            | NA       |
|                          | Black, NH                     | 14 (9.6%)              | 55 (9.6%)              | NA       |
|                          | Asian & Pacific Islander, NH  | 7 (4.8%)               | 34 (5.9%)              | NA       |
|                          | Alaskan & Native American, NH | 0 (0.0%)               | 2 (0.3%)               | NA       |
|                          | Other                         | 15 (10.3%)             | 65 (11.3%)             | NA       |

Abbreviations: SD (standard deviation), NH (non-Hispanic), NA (not applicable), GED (general education diploma)

**Supplemental Table 12. Demographic Characteristics of the Astrocytomas Dataset (ICCCMDG Code: 32)**

| <b>Characteristic</b>    | <b>Category</b>               | <b>Cases</b>       | <b>Controls</b>    | <b><i>p</i></b> |
|--------------------------|-------------------------------|--------------------|--------------------|-----------------|
| n                        |                               | 535                | 2123               | NA              |
| Birth year               | 1997-1999                     | 200 (37.4%)        | 803 (37.8%)        | 0.993           |
|                          | 2000-2002                     | 177 (33.1%)        | 699 (32.9%)        | NA              |
|                          | 2003-2005                     | 112 (20.9%)        | 446 (21%)          | NA              |
|                          | 2006-2007                     | 46 (8.6%)          | 175 (8.2%)         | NA              |
| Age at diagnosis         | 0-1                           | 108 (20.2%)        | NA                 | NA              |
|                          | 2-6                           | 314 (58.7%)        | NA                 | NA              |
|                          | >6                            | 113 (21.1%)        | NA                 | NA              |
| Sex                      | Male                          | 271 (50.7%)        | 1072 (50.5%)       | 0.986           |
|                          | Female                        | 264 (49.3%)        | 1051 (49.5%)       | NA              |
| Age of mother            | Mean (SD)                     | 28.64 (6.23)       | 27.9 (6.24)        | 0.014           |
| Age of father            | Mean (SD)                     | 31.43 (7.24)       | 30.79 (6.98)       | 0.072           |
| Median household income  | Mean (SD)                     | 53736.7 (27008.21) | 49301.6 (24167.54) | 0.001           |
| Adults without a GED     | Mean (SD)                     | 0.25 (0.20)        | 0.28 (0.22)        | 0.000           |
| Population density       | Mean (SD)                     | 0.00344 (0.00398)  | 0.00376 (0.00391)  | 0.100           |
| Race/ethnicity of mother | White, non-Hispanic           | 242 (45.2%)        | 906 (42.7%)        | 0.937           |
|                          | Hispanic                      | 204 (38.1%)        | 861 (40.6%)        | NA              |
|                          | Black, NH                     | 27 (5.0%)          | 110 (5.2%)         | NA              |
|                          | Asian & Pacific Islander, NH  | 43 (8.0%)          | 178 (8.4%)         | NA              |
|                          | Alaskan & Native American, NH | 2 (0.4%)           | 5 (0.2%)           | NA              |
|                          | Other                         | 17 (3.2%)          | 63 (3%)            | NA              |
| Race/ethnicity of father | White, non-Hispanic           | 225 (42.1%)        | 819 (38.6%)        | 0.686           |
|                          | Hispanic                      | 205 (38.3%)        | 830 (39.1%)        | NA              |
|                          | Black, NH                     | 33 (6.2%)          | 129 (6.1%)         | NA              |
|                          | Asian & Pacific Islander, NH  | 34 (6.4%)          | 176 (8.3%)         | NA              |
|                          | Alaskan & Native American, NH | 2 (0.4%)           | 10 (0.5%)          | NA              |
|                          | Other                         | 36 (6.7%)          | 159 (7.5%)         | NA              |

Abbreviations: SD (standard deviation), NH (non-Hispanic), NA (not applicable), GED (general education diploma)

**Supplemental Table 13. Demographic Characteristics of the Intracranial and Intraspinal Embryonal Tumors Dataset (ICCCMDG Code: 33)**

| Characteristic           | Category                      | Cases               | Controls           | <i>p</i> |
|--------------------------|-------------------------------|---------------------|--------------------|----------|
| n                        |                               | 333                 | 1316               | NA       |
| Birth year               | 1997-1999                     | 115 (34.5%)         | 462 (35.1%)        | 0.996    |
|                          | 2000-2002                     | 93 (27.9%)          | 368 (28%)          | NA       |
|                          | 2003-2005                     | 82 (24.6%)          | 317 (24.1%)        | NA       |
|                          | 2006-2007                     | 43 (12.9%)          | 169 (12.8%)        | NA       |
| Age at diagnosis         | 0-1                           | 110 (33.0%)         | NA                 | NA       |
|                          | 2-6                           | 167 (50.2%)         | NA                 | NA       |
|                          | >6                            | 56 (16.8%)          | NA                 | NA       |
| Sex                      | Male                          | 192 (57.7%)         | 750 (57%)          | 0.875    |
|                          | Female                        | 141 (42.3%)         | 566 (43%)          | NA       |
| Age of mother            | Mean (SD)                     | 28.37 (6.55)        | 28.03 (6.21)       | 0.390    |
| Age of father            | Mean (SD)                     | 31.50 (7.23)        | 30.95 (6.87)       | 0.225    |
| Median household income  | Mean (SD)                     | 51945.44 (25085.86) | 50144.7 (27033.36) | 0.250    |
| Adults without a GED     | Mean (SD)                     | 0.25 (0.19)         | 0.28 (0.22)        | 0.011    |
| Population density       | Mean (SD)                     | 0.0033 (0.00312)    | 0.00387 (0.00399)  | 0.005    |
| Race/ethnicity of mother | White, non-Hispanic           | 138 (41.4%)         | 533 (40.5%)        | 0.867    |
|                          | Hispanic                      | 146 (43.8%)         | 579 (44%)          | NA       |
|                          | Black, NH                     | 14 (4.2%)           | 55 (4.2%)          | NA       |
|                          | Asian & Pacific Islander, NH  | 26 (7.8%)           | 108 (8.2%)         | NA       |
|                          | Alaskan & Native American, NH | 1 (0.3%)            | 3 (0.2%)           | NA       |
|                          | Other                         | 8 (2.4%)            | 38 (2.9%)          | NA       |
| Race/ethnicity of father | White, non-Hispanic           | 134 (40.2%)         | 490 (37.2%)        | 0.403    |
|                          | Hispanic                      | 135 (40.5%)         | 529 (40.2%)        | NA       |
|                          | Black, NH                     | 18 (5.4%)           | 73 (5.5%)          | NA       |
|                          | Asian & Pacific Islander, NH  | 22 (6.6%)           | 107 (8.1%)         | NA       |
|                          | Alaskan & Native American, NH | 1 (0.3%)            | 4 (0.3%)           | NA       |
|                          | Other                         | 23 (6.9%)           | 113 (8.6%)         | NA       |

Abbreviations: SD (standard deviation), NH (non-Hispanic), NA (not applicable), GED (general education diploma)

**Supplemental Table 14. Demographic Characteristics of the Other Gliomas Dataset (ICCCMDG Code: 34)**

| Characteristic           | Category                      | Cases               | Controls           | <i>p</i> |
|--------------------------|-------------------------------|---------------------|--------------------|----------|
| n                        |                               | 159                 | 637                | NA       |
| Birth year               | 1997-1999                     | 69 (43.4%)          | 274 (43.0%)        | 0.998    |
|                          | 2000-2002                     | 43 (27.0%)          | 173 (27.2%)        | NA       |
|                          | 2003-2005                     | 36 (22.6%)          | 148 (23.2%)        | NA       |
|                          | 2006-2007                     | 11 (6.9%)           | 42 (6.6%)          | NA       |
| Age at diagnosis         | 0-1                           | 19 (11.9%)          | NA                 | NA       |
|                          | 2-6                           | 98 (61.6%)          | NA                 | NA       |
|                          | >6                            | 42 (26.4%)          | NA                 | NA       |
| Sex                      | Male                          | 74 (46.5%)          | 299 (46.9%)        | 0.999    |
|                          | Female                        | 85 (53.5%)          | 338 (53.1%)        | NA       |
| Age of mother            | Mean (SD)                     | 29.02 (6.53)        | 27.81 (6.43)       | 0.037    |
| Age of father            | Mean (SD)                     | 32.22 (7.69)        | 30.68 (6.95)       | 0.028    |
| Median household income  | Mean (SD)                     | 50961.06 (22779.61) | 48837.8 (24682.22) | 0.302    |
| Adults without a GED     | Mean (SD)                     | 0.28 (0.21)         | 0.29 (0.22)        | 0.479    |
| Population density       | Mean (SD)                     | 0.00386 (0.00303)   | 0.00382 (0.0039)   | 0.895    |
| Race/ethnicity of mother | White, non-Hispanic           | 63 (39.6%)          | 233 (36.6%)        | 0.985    |
|                          | Hispanic                      | 65 (40.9%)          | 283 (44.4%)        | NA       |
|                          | Black, NH                     | 8 (5.0%)            | 32 (5.0%)          | NA       |
|                          | Asian & Pacific Islander, NH  | 18 (11.3%)          | 70 (11.0%)         | NA       |
|                          | Alaskan & Native American, NH | 0 (0.0%)            | 1 (0.2%)           | NA       |
|                          | Other                         | 5 (3.1%)            | 18 (2.8%)          | NA       |
| Race/ethnicity of father | White, non-Hispanic           | 56 (35.2%)          | 227 (35.6%)        | 0.899    |
|                          | Hispanic                      | 62 (39.0%)          | 261 (41.0%)        | NA       |
|                          | Black, NH                     | 10 (6.3%)           | 31 (4.9%)          | NA       |
|                          | Asian & Pacific Islander, NH  | 18 (11.3%)          | 67 (10.5%)         | NA       |
|                          | Alaskan & Native American, NH | 0 (0.0%)            | 3 (0.5%)           | NA       |
|                          | Other                         | 13 (8.2%)           | 48 (7.5%)          | NA       |

Abbreviations: SD (standard deviation), NH (non-Hispanic), NA (not applicable), GED (general education diploma)

**Supplemental Table 15. Demographic Characteristics of the Neuroblastoma and Ganglioneuroblastoma Dataset (ICCCMDG Code: 41)**

| Characteristic           | Category                      | Cases               | Controls           | <i>p</i> |
|--------------------------|-------------------------------|---------------------|--------------------|----------|
| n                        |                               | 529                 | 2096               | NA       |
| Birth year               | 1997-1999                     | 148 (28.0%)         | 586 (28.0%)        | 0.997    |
|                          | 2000-2002                     | 140 (26.5%)         | 564 (26.9%)        | NA       |
|                          | 2003-2005                     | 166 (31.4%)         | 651 (31.1%)        | NA       |
|                          | 2006-2007                     | 75 (14.2%)          | 295 (14.1%)        | NA       |
| Age at diagnosis         | 0-1                           | 326 (61.6%)         | NA                 | NA       |
|                          | 2-6                           | 187 (35.3%)         | NA                 | NA       |
|                          | >6                            | 16 (3.0%)           | NA                 | NA       |
| Sex                      | Male                          | 306 (57.8%)         | 1205 (57.5%)       | 0.922    |
|                          | Female                        | 223 (42.2%)         | 891 (42.5%)        | NA       |
| Age of mother            | Mean (SD)                     | 28.11 (6.38)        | 28.34 (6.24)       | 0.457    |
| Age of father            | Mean (SD)                     | 30.89 (7.25)        | 31.42 (7.2)        | 0.139    |
| Median household income  | Mean (SD)                     | 50884.01 (26054.15) | 49968.3 (25748.05) | 0.469    |
| Adults without a GED     | Mean (SD)                     | 0.27 (0.21)         | 0.28 (0.22)        | 0.114    |
| Population density       | Mean (SD)                     | 0.00388 (0.00478)   | 0.0038 (0.00398)   | 0.718    |
| Race/ethnicity of mother | White, non-Hispanic           | 233 (44.0%)         | 877 (41.8%)        | 0.868    |
|                          | Hispanic                      | 195 (36.9%)         | 826 (39.4%)        | NA       |
|                          | Black, NH                     | 30 (5.7%)           | 117 (5.6%)         | NA       |
|                          | Asian & Pacific Islander, NH  | 46 (8.7%)           | 187 (8.9%)         | NA       |
|                          | Alaskan & Native American, NH | 2 (0.4%)            | 3 (0.1%)           | NA       |
|                          | Other                         | 23 (4.3%)           | 86 (4.1%)          | NA       |
| Race/ethnicity of father | White, non-Hispanic           | 210 (39.7%)         | 812 (38.7%)        | 0.905    |
|                          | Hispanic                      | 189 (35.7%)         | 781 (37.3%)        | NA       |
|                          | Black, NH                     | 38 (7.2%)           | 122 (5.8%)         | NA       |
|                          | Asian & Pacific Islander, NH  | 40 (7.6%)           | 171 (8.2%)         | NA       |
|                          | Alaskan & Native American, NH | 4 (0.8%)            | 13 (0.6%)          | NA       |
|                          | Other                         | 48 (9.1%)           | 197 (9.4%)         | NA       |

Abbreviations: SD (standard deviation), NH (non-Hispanic), NA (not applicable), GED (general education diploma)

**Supplemental Table 16. Demographic Characteristics of the Retinoblastoma Dataset (ICCCMDG Code: 50)**

| Characteristic           | Category                      | Cases               | Controls            | <i>p</i> |
|--------------------------|-------------------------------|---------------------|---------------------|----------|
| n                        |                               | 293                 | 1142                | NA       |
| Birth year               | 1997-1999                     | 82 (28.0%)          | 322 (28.2%)         | 1.000    |
|                          | 2000-2002                     | 77 (26.3%)          | 301 (26.4%)         | NA       |
|                          | 2003-2005                     | 86 (29.4%)          | 335 (29.3%)         | NA       |
|                          | 2006-2007                     | 48 (16.4%)          | 184 (16.1%)         | NA       |
| Age at diagnosis         | 0-1                           | 207 (70.6%)         | NA                  | NA       |
|                          | 2-6                           | 82 (28.0%)          | NA                  | NA       |
|                          | >6                            | 4 (1.4%)            | NA                  | NA       |
| Sex                      | Male                          | 167 (57.0%)         | 654 (57.3%)         | 0.986    |
|                          | Female                        | 126 (43.0%)         | 488 (42.7%)         | NA       |
| Age of mother            | Mean (SD)                     | 28.12 (6.29)        | 27.79 (6.52)        | 0.432    |
| Age of father            | Mean (SD)                     | 31.04 (7.34)        | 30.77 (7.19)        | 0.579    |
| Median household income  | Mean (SD)                     | 48609.37 (26731.04) | 47313.37 (22817.53) | 0.447    |
| Adults without a GED     | Mean (SD)                     | 0.32 (0.22)         | 0.31 (0.22)         | 0.438    |
| Population density       | Mean (SD)                     | 0.00432 (0.00442)   | 0.00405 (0.00383)   | 0.333    |
| Race/ethnicity of mother | White, non-Hispanic           | 87 (29.7%)          | 325 (28.5%)         | 0.992    |
|                          | Hispanic                      | 148 (50.5%)         | 575 (50.4%)         | NA       |
|                          | Black, NH                     | 14 (4.8%)           | 56 (4.9%)           | NA       |
|                          | Asian & Pacific Islander, NH  | 28 (9.6%)           | 123 (10.8%)         | NA       |
|                          | Alaskan & Native American, NH | 2 (0.7%)            | 5 (0.4%)            | NA       |
|                          | Other                         | 14 (4.8%)           | 58 (5.1%)           | NA       |
| Race/ethnicity of father | White, non-Hispanic           | 82 (28.0%)          | 319 (27.9%)         | 0.879    |
|                          | Hispanic                      | 136 (46.4%)         | 542 (47.5%)         | NA       |
|                          | Black, NH                     | 15 (5.1%)           | 62 (5.4%)           | NA       |
|                          | Asian & Pacific Islander, NH  | 27 (9.2%)           | 105 (9.2%)          | NA       |
|                          | Alaskan & Native American, NH | 2 (0.7%)            | 2 (0.2%)            | NA       |
|                          | Other                         | 31 (10.6%)          | 112 (9.8%)          | NA       |

Abbreviations: SD (standard deviation), NH (non-Hispanic), NA (not applicable), GED (general education diploma)



**Supplemental Table 17. Demographic Characteristics of the Nephroblastoma and Other Nonepithelial Renal Tumors Dataset (ICCCMDG Code: 61)**

| Characteristic           | Category                      | Cases               | Controls           | <i>p</i> |
|--------------------------|-------------------------------|---------------------|--------------------|----------|
| n                        |                               | 415                 | 1649               | NA       |
| Birth year               | 1997-1999                     | 108 (26%)           | 431 (26.1%)        | 0.998    |
|                          | 2000-2002                     | 135 (32.5%)         | 529 (32.1%)        | NA       |
|                          | 2003-2005                     | 112 (27.0%)         | 447 (27.1%)        | NA       |
|                          | 2006-2007                     | 60 (14.5%)          | 242 (14.7%)        | NA       |
| Age at diagnosis         | 0-1                           | 147 (35.4%)         | NA                 | NA       |
|                          | 2-6                           | 246 (59.3%)         | NA                 | NA       |
|                          | >6                            | 22 (5.3%)           | NA                 | NA       |
| Sex                      | Male                          | 201 (48.4%)         | 797 (48.3%)        | 1.000    |
|                          | Female                        | 214 (51.6%)         | 852 (51.7%)        | NA       |
| Age of mother            | Mean (SD)                     | 28.68 (6.33)        | 27.92 (6.43)       | 0.030    |
| Age of father            | Mean (SD)                     | 31.55 (7.05)        | 30.88 (7.33)       | 0.095    |
| Median household income  | Mean (SD)                     | 50185.42 (23200.77) | 47910.82 (23065.5) | 0.074    |
| Adults without a GED     | Mean (SD)                     | 0.27 (0.21)         | 0.30 (0.22)        | 0.020    |
| Population density       | Mean (SD)                     | 0.00331 (0.00295)   | 0.00383 (0.00344)  | 0.002    |
| Race/ethnicity of mother | White, non-Hispanic           | 154 (37.1%)         | 608 (36.9%)        | 0.990    |
|                          | Hispanic                      | 182 (43.9%)         | 725 (44%)          | NA       |
|                          | Black, NH                     | 40 (9.6%)           | 157 (9.5%)         | NA       |
|                          | Asian & Pacific Islander, NH  | 26 (6.3%)           | 103 (6.2%)         | NA       |
|                          | Alaskan & Native American, NH | 2 (0.5%)            | 5 (0.3%)           | NA       |
|                          | Other                         | 11 (2.7%)           | 51 (3.1%)          | NA       |
| Race/ethnicity of father | White, non-Hispanic           | 151 (36.4%)         | 555 (33.7%)        | 0.675    |
|                          | Hispanic                      | 171 (41.2%)         | 677 (41.1%)        | NA       |
|                          | Black, NH                     | 41 (9.9%)           | 150 (9.1%)         | NA       |
|                          | Asian & Pacific Islander, NH  | 21 (5.1%)           | 107 (6.5%)         | NA       |
|                          | Alaskan & Native American, NH | 1 (0.2%)            | 7 (0.4%)           | NA       |
|                          | Other                         | 30 (7.2%)           | 153 (9.3%)         | NA       |

Abbreviations: SD (standard deviation), NH (non-Hispanic), NA (not applicable), GED (general education diploma)

**Supplemental Table 18. Demographic Characteristics of the Hepatoblastoma Dataset (ICCCMDG Code: 71)**

| Characteristic           | Category                      | Cases               | Controls            | <i>p</i> |
|--------------------------|-------------------------------|---------------------|---------------------|----------|
| n                        |                               | 143                 | 568                 | NA       |
| Birth year               | 1997-1999                     | 36 (25.2%)          | 142 (25.0%)         | 0.999    |
|                          | 2000-2002                     | 36 (25.2%)          | 147 (25.9%)         | NA       |
|                          | 2003-2005                     | 44 (30.8%)          | 173 (30.5%)         | NA       |
|                          | 2006-2007                     | 27 (18.9%)          | 106 (18.7%)         | NA       |
| Age at diagnosis         | 0-1                           | 90 (62.9%)          | NA                  | NA       |
|                          | 2-6                           | 49 (34.3%)          | NA                  | NA       |
|                          | >6                            | 4 (2.8%)            | NA                  | NA       |
| Sex                      | Male                          | 87 (60.8%)          | 341 (60.0%)         | 0.936    |
|                          | Female                        | 56 (39.2%)          | 227 (40.0%)         | NA       |
| Age of mother            | Mean (SD)                     | 29.59 (6.99)        | 28.32 (6.04)        | 0.046    |
| Age of father            | Mean (SD)                     | 31.98 (7.46)        | 31.19 (7.28)        | 0.268    |
| Median household income  | Mean (SD)                     | 57516.51 (32263.85) | 49379.21 (25270.41) | 0.006    |
| Adults without a GED     | Mean (SD)                     | 0.28 (0.24)         | 0.29 (0.21)         | 0.648    |
| Population density       | Mean (SD)                     | 0.00353 (0.00327)   | 0.00366 (0.00337)   | 0.681    |
| Race/ethnicity of mother | White, non-Hispanic           | 54 (37.8%)          | 224 (39.4%)         | 0.988    |
|                          | Hispanic                      | 60 (42%)            | 236 (41.5%)         | NA       |
|                          | Black, NH                     | 5 (3.5%)            | 21 (3.7%)           | NA       |
|                          | Asian & Pacific Islander, NH  | 16 (11.2%)          | 63 (11.1%)          | NA       |
|                          | Alaskan & Native American, NH | 0 (0%)              | 0 (0.0%)            | NA       |
|                          | Other                         | 8 (5.6%)            | 24 (4.2%)           | NA       |
| Race/ethnicity of father | White, non-Hispanic           | 53 (37.1%)          | 194 (34.2%)         | 0.798    |
|                          | Hispanic                      | 63 (44.1%)          | 238 (41.9%)         | NA       |
|                          | Black, NH                     | 6 (4.2%)            | 26 (4.6%)           | NA       |
|                          | Asian & Pacific Islander, NH  | 11 (7.7%)           | 53 (9.3%)           | NA       |
|                          | Alaskan & Native American, NH | 0 (0%)              | 3 (0.5%)            | NA       |
|                          | Other                         | 10 (7%)             | 54 (9.5%)           | NA       |

Abbreviations: SD (standard deviation), NH (non-Hispanic), NA (not applicable), GED (general education diploma)

**Supplemental Table 19. Demographic Characteristics of the Osteosarcomas Dataset (ICCCMDG Code: 81)**

| <b>Characteristic</b>    | <b>Category</b>               | <b>Cases</b>        | <b>Controls</b>    | <b>p</b> |
|--------------------------|-------------------------------|---------------------|--------------------|----------|
| n                        |                               | 72                  | 283                | NA       |
| Birth year               | 1997-1999                     | 45 (62.5%)          | 175 (61.8%)        | 0.995    |
|                          | 2000-2002                     | 21 (29.2%)          | 84 (29.7%)         | NA       |
|                          | 2003-2005                     | 6 (8.3%)            | 24 (8.5%)          | NA       |
|                          | 2006-2007                     | 0 (0.0%)            | 0 (0.0%)           | NA       |
| Age at diagnosis         | 0-1                           | 1 (1.4%)            | NA                 | NA       |
|                          | 2-6                           | 21 (29.2%)          | NA                 | NA       |
|                          | >6                            | 50 (69.4%)          | NA                 | NA       |
| Sex                      | Male                          | 40 (55.6%)          | 157 (55.5%)        | 1.000    |
|                          | Female                        | 32 (44.4%)          | 126 (44.5%)        | NA       |
| Age of mother            | Mean (SD)                     | 26.81 (6.27)        | 27.33 (6.49)       | 0.532    |
| Age of father            | Mean (SD)                     | 30.7 (0.6)          | 29.99 (6.42)       | 0.483    |
| Median household income  | Mean (SD)                     | 45199.15 (20651.82) | 46826.28 (24139.8) | 0.566    |
| Adults without a GED     | Mean (SD)                     | 0.32 (0.24)         | 0.33 (0.23)        | 0.909    |
| Population density       | Mean (SD)                     | 0.00463 (0.00832)   | 0.00421 (0.00373)  | 0.679    |
| Race/ethnicity of mother | White, non-Hispanic           | 26 (36.1%)          | 102 (36.0%)        | 0.783    |
|                          | Hispanic                      | 31 (43.1%)          | 121 (42.8%)        | NA       |
|                          | Black, NH                     | 9 (12.5%)           | 35 (12.4%)         | NA       |
|                          | Asian & Pacific Islander, NH  | 6 (8.3%)            | 25 (8.8%)          | NA       |
|                          | Alaskan & Native American, NH | 0 (0.0%)            | 0 (0%)             | NA       |
|                          | Other                         | 0 (0.0%)            | 0 (0.0%)           | NA       |
| Race/ethnicity of father | White, non-Hispanic           | 25 (34.7%)          | 97 (34.3%)         | 0.341    |
|                          | Hispanic                      | 26 (36.1%)          | 121 (42.8%)        | NA       |
|                          | Black, NH                     | 12 (16.7%)          | 34 (12.0%)         | NA       |
|                          | Asian & Pacific Islander, NH  | 7 (9.7%)            | 14 (4.9%)          | NA       |
|                          | Alaskan & Native American, NH | 0 (0.0%)            | 0 (0.0%)           | NA       |
|                          | Other                         | 2 (2.8%)            | 21 (7.4%)          | NA       |

Abbreviations: SD (standard deviation), NH (non-Hispanic), NA (not applicable), GED (general education diploma)

**Supplemental Table 20. Demographic Characteristics of the Rhabdomyosarcomas Dataset (ICCCMDG Code: 91)**

| <b>Characteristic</b>    | <b>Category</b>               | <b>Cases</b>        | <b>Controls</b>     | <b><i>p</i></b> |
|--------------------------|-------------------------------|---------------------|---------------------|-----------------|
| n                        |                               | 242                 | 967                 | NA              |
| Birth year               | 1997-1999                     | 93 (38.4%)          | 366 (37.8%)         | 0.982           |
|                          | 2000-2002                     | 68 (28.1%)          | 266 (27.5%)         | NA              |
|                          | 2003-2005                     | 47 (19.4%)          | 199 (20.6%)         | NA              |
|                          | 2006-2007                     | 34 (14%)            | 136 (14.1%)         | NA              |
| Age at diagnosis         | 0-1                           | 72 (29.8%)          | NA                  | NA              |
|                          | 2-6                           | 128 (52.9%)         | NA                  | NA              |
|                          | >6                            | 42 (17.4%)          | NA                  | NA              |
| Sex                      | Male                          | 144 (59.5%)         | 579 (59.9%)         | 0.974           |
|                          | Female                        | 98 (40.5%)          | 388 (40.1%)         | NA              |
| Age of mother            | Mean (SD)                     | 28.28 (6.14)        | 27.85 (6.34)        | 0.336           |
| Age of father            | Mean (SD)                     | 31.41 (7.33)        | 30.69 (7.22)        | 0.187           |
| Median household income  | Mean (SD)                     | 50145.42 (23793.65) | 47845.24 (23666.96) | 0.179           |
| Adults without a GED     | Mean (SD)                     | 0.28 (0.2)          | 0.30 (0.22)         | 0.139           |
| Population density       | Mean (SD)                     | 0.0036 (0.00511)    | 0.00396 (0.00401)   | 0.313           |
| Race/ethnicity of mother | White, non-Hispanic           | 79 (32.6%)          | 302 (31.2%)         | 0.881           |
|                          | Hispanic                      | 108 (44.6%)         | 435 (45.0%)         | NA              |
|                          | Black, NH                     | 18 (7.4%)           | 77 (8.0%)           | NA              |
|                          | Asian & Pacific Islander, NH  | 25 (10.3%)          | 101 (10.4%)         | NA              |
|                          | Alaskan & Native American, NH | 1 (0.4%)            | 13 (1.3%)           | NA              |
|                          | Other                         | 11 (4.5%)           | 39 (4%)             | NA              |
| Race/ethnicity of father | White, non-Hispanic           | 83 (34.3%)          | 296 (30.6%)         | 0.825           |
|                          | Hispanic                      | 98 (40.5%)          | 410 (42.4%)         | NA              |
|                          | Black, NH                     | 17 (7.0%)           | 81 (8.4%)           | NA              |
|                          | Asian & Pacific Islander, NH  | 22 (9.1%)           | 83 (8.6%)           | NA              |
|                          | Alaskan & Native American, NH | 1 (0.4%)            | 2 (0.2%)            | NA              |
|                          | Other                         | 21 (8.7%)           | 95 (9.8%)           | NA              |

Abbreviations: SD (standard deviation), NH (non-Hispanic), NA (not applicable), GED (general education diploma)

**Supplemental Table 21. Demographic Characteristics of the Other Specified Soft Tissue Carcinomas (Besides Rhabdomyosarcomas and Fibrous Neoplasms) Dataset (ICCCMDG Code: 94)**

| Characteristic           | Category                      | Cases                  | Controls            | <i>p</i> |
|--------------------------|-------------------------------|------------------------|---------------------|----------|
| n                        |                               | 85                     | 334                 | NA       |
| Birth year               | 1997-1999                     | 35 (41.2%)             | 139 (41.6%)         | 1.000    |
|                          | 2000-2002                     | 22 (25.9%)             | 85 (25.4%)          | NA       |
|                          | 2003-2005                     | 16 (18.8%)             | 63 (18.9%)          | NA       |
|                          | 2006-2007                     | 12 (14.1%)             | 47 (14.1%)          | NA       |
| Age at diagnosis         | 0-1                           | 20 (23.5%)             | NA                  | NA       |
|                          | 2-6                           | 33 (38.8%)             | NA                  | NA       |
|                          | >6                            | 32 (37.6%)             | NA                  | NA       |
| Sex                      | Male                          | 47 (55.3%)             | 183 (54.8%)         | 1.000    |
|                          | Female                        | 38 (44.7%)             | 151 (45.2%)         | NA       |
| Age of mother            | Mean (SD)                     | 28.82 (5.66)           | 28.01 (6.44)        | 0.255    |
| Age of father            | Mean (SD)                     | 31.21 (7563945)        | 30.7 (7.41)         | 0.530    |
| Median household income  | Mean (SD)                     | 46146.68<br>(21909.30) | 50474.46 (23350.38) | 0.111    |
| Adults without a GED     | Mean (SD)                     | 0.29 (0.22)            | 0.28 (0.23)         | 0.517    |
| Population density       | Mean (SD)                     | 0.00444 (0.00505)      | 0.00405 (0.00424)   | 0.512    |
| Race/ethnicity of mother | White, non-Hispanic           | 34 (40%)               | 125 (37.4%)         | 0.729    |
|                          | Hispanic                      | 36 (42.4%)             | 149 (44.6%)         | NA       |
|                          | Black, NH                     | 2 (2.4%)               | 10 (3.0%)           | NA       |
|                          | Asian & Pacific Islander, NH  | 10 (11.8%)             | 35 (10.5%)          | NA       |
|                          | Alaskan & Native American, NH | 0 (0.0%)               | 1 (0.3%)            | NA       |
|                          | Other                         | 3 (3.5%)               | 14 (4.2%)           | NA       |
| Race/ethnicity of father | White, non-Hispanic           | 35 (41.2%)             | 125 (37.4%)         | 0.785    |
|                          | Hispanic                      | 35 (41.2%)             | 139 (41.6%)         | NA       |
|                          | Black, NH                     | 3 (3.5%)               | 11 (3.3%)           | NA       |
|                          | Asian & Pacific Islander, NH  | 4 (4.7%)               | 30 (9.0%)           | NA       |
|                          | Alaskan & Native American, NH | 0 (0.0%)               | 3 (0.9%)            | NA       |
|                          | Other                         | 8 (9.4%)               | 26 (7.8%)           | NA       |

Abbreviations: SD (standard deviation), NH (non-Hispanic), NA (not applicable), GED (general education diploma)

**Supplemental Table 22. Demographic Characteristics of the Malignant Extracranial and Extragonadal Germ Cell Tumors Dataset (ICCCMDG Code: 102)**

| Characteristic           | Category                      | Cases               | Controls            | <i>p</i> |
|--------------------------|-------------------------------|---------------------|---------------------|----------|
| n                        |                               | 87                  | 337                 | NA       |
| Birth year               | 1997-1999                     | 24 (27.6%)          | 95 (28.2%)          | 0.997    |
|                          | 2000-2002                     | 32 (36.8%)          | 126 (37.4%)         | NA       |
|                          | 2003-2005                     | 20 (23%)            | 75 (22.3%)          | NA       |
|                          | 2006-2007                     | 11 (12.6%)          | 41 (12.2%)          | NA       |
| Age at diagnosis         | 0-1                           | 72 (82.8%)          | NA                  | NA       |
|                          | 2-6                           | 12 (13.8%)          | NA                  | NA       |
|                          | >6                            | 3 (3.4%)            | NA                  | NA       |
| Sex                      | Male                          | 34 (39.1%)          | 132 (39.2%)         | 1.000    |
|                          | Female                        | 53 (60.9%)          | 205 (60.8%)         | NA       |
| Age of mother            | Mean (SD)                     | 28.01 (6.9)         | 28.71 (6.34)        | 0.396    |
| Age of father            | Mean (SD)                     | 31.38 (7.04)        | 31.27 (6.58)        | 0.906    |
| Median household income  | Mean (SD)                     | 50016.23 (23219.66) | 52096.83 (26566.12) | 0.471    |
| Adults without a GED     | Mean (SD)                     | 0.25 (0.21)         | 0.27 (0.22)         | 0.563    |
| Population density       | Mean (SD)                     | 0.00335 (0.00296)   | 0.00386 (0.00406)   | 0.187    |
| Race/ethnicity of mother | White, non-Hispanic           | 33 (37.9%)          | 126 (37.4%)         | 0.997    |
|                          | Hispanic                      | 27 (31%)            | 104 (30.9%)         | NA       |
|                          | Black, NH                     | 5 (5.7%)            | 18 (5.3%)           | NA       |
|                          | Asian & Pacific Islander, NH  | 16 (18.4%)          | 64 (19%)            | NA       |
|                          | Alaskan & Native American, NH | 0 (0%)              | 1 (0.3%)            | NA       |
|                          | Other                         | 6 (6.9%)            | 24 (7.1%)           | NA       |
| Race/ethnicity of father | White, non-Hispanic           | 29 (33.3%)          | 114 (33.8%)         | 0.919    |
|                          | Hispanic                      | 27 (31%)            | 110 (32.6%)         | NA       |
|                          | Black, NH                     | 3 (3.4%)            | 14 (4.2%)           | NA       |
|                          | Asian & Pacific Islander, NH  | 13 (14.9%)          | 55 (16.3%)          | NA       |
|                          | Alaskan & Native American, NH | 0 (0%)              | 2 (0.6%)            | NA       |
|                          | Other                         | 15 (17.2%)          | 42 (12.5%)          | NA       |

Abbreviations: SD (standard deviation), NH (non-Hispanic), NA (not applicable), GED (general education diploma)

**Supplemental Table 23. Demographic Characteristics of the Malignant Gonadal Germ Cell Tumors Dataset (ICCCMDG Code: 103)**

| Characteristic           | Category                      | Cases               | Controls            | <i>p</i> |
|--------------------------|-------------------------------|---------------------|---------------------|----------|
| n                        |                               | 72                  | 291                 | NA       |
| Birth year               | 1997-1999                     | 29 (40.3%)          | 115 (39.5%)         | 0.994    |
|                          | 2000-2002                     | 16 (22.2%)          | 64 (22%)            | NA       |
|                          | 2003-2005                     | 12 (16.7%)          | 47 (16.2%)          | NA       |
|                          | 2006-2007                     | 15 (20.8%)          | 65 (22.3%)          | NA       |
| Age at diagnosis         | 0-1                           | 40 (55.6%)          | NA                  | NA       |
|                          | 2-6                           | 17 (23.6%)          | NA                  | NA       |
|                          | >6                            | 15 (20.8%)          | NA                  | NA       |
| Sex                      | Male                          | 50 (69.4%)          | 204 (70.1%)         | 1.000    |
|                          | Female                        | 22 (30.6%)          | 87 (29.9%)          | NA       |
| Age of mother            | Mean (SD)                     | 28.06 (5.94)        | 27.22 (5.91)        | 0.289    |
| Age of father            | Mean (SD)                     | 30.83 (5.86)        | 29.8 (6.64)         | 0.219    |
| Median household income  | Mean (SD)                     | 43955.82 (19377.96) | 43088.76 (19301.61) | 0.734    |
| Adults without a GED     | Mean (SD)                     | 0.36 (0.24)         | 0.35 (0.22)         | 0.669    |
| Population density       | Mean (SD)                     | 0.00512 (0.00393)   | 0.00441 (0.00425)   | 0.184    |
| Race/ethnicity of mother | White, non-Hispanic           | 9 (12.5%)           | 41 (14.1%)          | 0.976    |
|                          | Hispanic                      | 44 (61.1%)          | 182 (62.5%)         | NA       |
|                          | Black, NH                     | 4 (5.6%)            | 16 (5.5%)           | NA       |
|                          | Asian & Pacific Islander, NH  | 10 (13.9%)          | 32 (11%)            | NA       |
|                          | Alaskan & Native American, NH | 0 (0%)              | 2 (0.7%)            | NA       |
|                          | Other                         | 5 (6.9%)            | 18 (6.2%)           | NA       |
| Race/ethnicity of father | White, non-Hispanic           | 8 (11.1%)           | 50 (17.2%)          | 0.672    |
|                          | Hispanic                      | 39 (54.2%)          | 182 (62.5%)         | NA       |
|                          | Black, NH                     | 5 (6.9%)            | 16 (5.5%)           | NA       |
|                          | Asian & Pacific Islander, NH  | 8 (11.1%)           | 24 (8.2%)           | NA       |
|                          | Alaskan & Native American, NH | 0 (0%)              | 0 (0%)              | NA       |
|                          | Other                         | 12 (16.7%)          | 35 (12%)            | NA       |

Abbreviations: SD (standard deviation), NH (non-Hispanic), NA (not applicable), GED (general education diploma)

**Supplemental Table 24. Demographic Characteristics of the Malignant Melanomas Dataset (ICCCMDG Code: 114)**

| <b>Characteristic</b>    | <b>Category</b>               | <b>Cases</b>        | <b>Controls</b>     | <b><i>p</i></b> |
|--------------------------|-------------------------------|---------------------|---------------------|-----------------|
| n                        |                               | 50                  | 198                 | NA              |
| Birth year               | 1997-1999                     | 29 (58.0%)          | 114 (57.6%)         | 1.000           |
|                          | 2000-2002                     | 9 (18.0%)           | 36 (18.2%)          | NA              |
|                          | 2003-2005                     | 10 (20.0%)          | 40 (20.2%)          | NA              |
|                          | 2006-2007                     | 2 (4.0%)            | 8 (4.0%)            | NA              |
| Age at diagnosis         | 0-1                           | 6 (12.0%)           | NA                  | NA              |
|                          | 2-6                           | 26 (52.0%)          | NA                  | NA              |
|                          | >6                            | 18 (36.0%)          | NA                  | NA              |
| Sex                      | Male                          | 24 (48.0%)          | 95 (48.0%)          | 1.000           |
|                          | Female                        | 26 (52%)            | 103 (52.0%)         | NA              |
| Age of mother            | Mean (SD)                     | 30.22 (5.28)        | 28.72 (6.25)        | 0.087           |
| Age of father            | Mean (SD)                     | 33.06 (6.32)        | 31.59 (6.81)        | 0.155           |
| Median household income  | Mean (SD)                     | 60853.64 (27152.46) | 52660.13 (27306.11) | 0.061           |
| Adults without a GED     | Mean (SD)                     | 0.18 (0.18)         | 0.25 (0.21)         | 0.018           |
| Population density       | Mean (SD)                     | 0.00285 (0.00257)   | 0.00354 (0.00385)   | 0.134           |
| Race/ethnicity of mother | White, non-Hispanic           | 32 (64.0%)          | 111 (56.1%)         | 0.673           |
|                          | Hispanic                      | 10 (20.0%)          | 56 (28.3%)          | NA              |
|                          | Black, NH                     | 0 (0.0%)            | 0 (0.0%)            | NA              |
|                          | Asian & Pacific Islander, NH  | 6 (12.0%)           | 23 (11.6%)          | NA              |
|                          | Alaskan & Native American, NH | 0 (0.0%)            | 2 (1.0%)            | NA              |
|                          | Other                         | 2 (4.0%)            | 6 (3.0%)            | NA              |
| Race/ethnicity of father | White, non-Hispanic           | 29 (58.0%)          | 98 (49.5%)          | 0.689           |
|                          | Hispanic                      | 13 (26.0%)          | 51 (25.8%)          | NA              |
|                          | Black, NH                     | 0 (0.0%)            | 4 (2.0%)            | NA              |
|                          | Asian & Pacific Islander, NH  | 6 (12.0%)           | 26 (13.1%)          | NA              |
|                          | Alaskan & Native American, NH | 0 (0.0%)            | 2 (1.0%)            | NA              |
|                          | Other                         | 2 (4.0%)            | 17 (8.6%)           | NA              |

Abbreviations: SD (standard deviation), NH (non-Hispanic), NA (not applicable), GED (general education diploma)
